# Supplementary material for: High level of CD73 predicts poor prognosis of intrahepatic cholangiocarcinoma
Source: PubMed Central journal article supplement (PMC8210563; doi:10.7150/jca.51038), 2021-06-04
Supplement: jcav12p4655s1.pdf [file jcav12p4655s1.pdf]

Supplementary

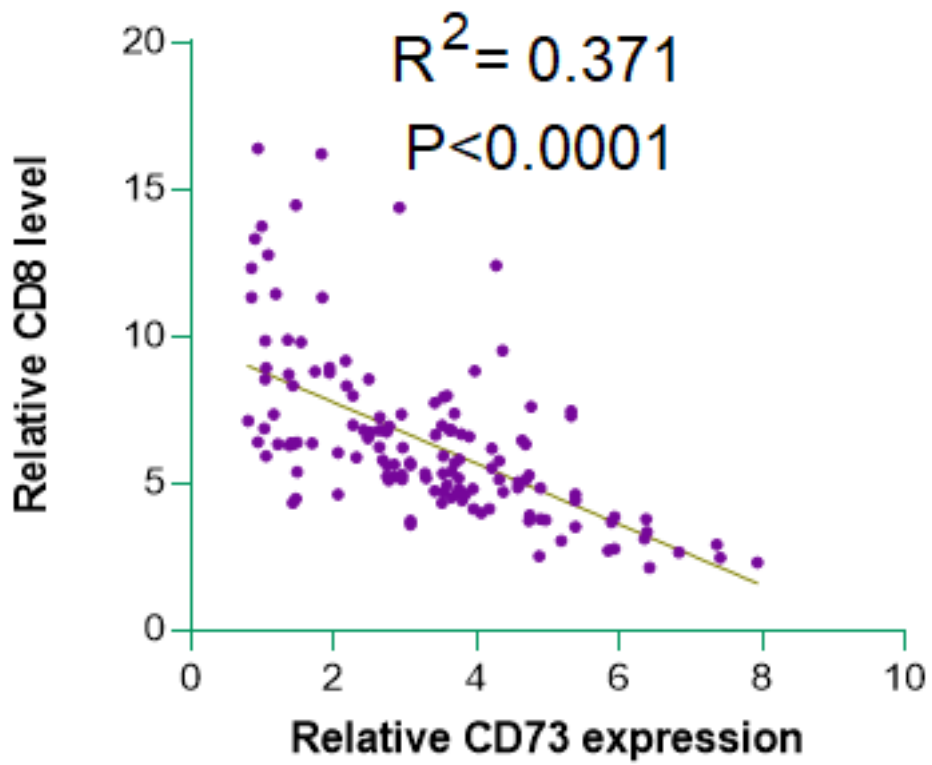

**Figure s1.** The relation between CD73 and CD8 staining in ICC tissues. The CD73 expression was weakly negatively associated with the CD8 staining in ICC tissues.
